# Supplementary material for: Normal 2-Dimensional Strain Values of the Left Ventricle: A Substudy of the Normal Echocardiographic Measurements in Korean Population Study
Source: PubMed Central journal article supplement — J Cardiovasc Ultrasound. 2016 Dec 28;24(4):285–93. doi: 10.4250/jcu.2016.24.4.285 (PMC5234340; doi:10.4250/jcu.2016.24.4.285), 2016-12-28
Supplement: jcu-24-285-s001.pdf [file jcu-24-285-s001.pdf]

**Supplementary Table 1. Baseline characteristics and conventional echocardiographic values according to sex and age (mean ± SD)**

| Age                                              | Females (n = 265) |                   |                   |                   |                   | Males (n = 236)   |                   |                   |                   |                   | p value   |                   |                   |
|--------------------------------------------------|-------------------|-------------------|-------------------|-------------------|-------------------|-------------------|-------------------|-------------------|-------------------|-------------------|-----------|-------------------|-------------------|
|                                                  | 21-30<br>(n = 46) | 31-40<br>(n = 51) | 41-50<br>(n = 58) | 51-60<br>(n = 53) | 61-70<br>(n = 39) | 71-80<br>(n = 18) | 21-30<br>(n = 39) | 31-40<br>(n = 51) | 41-50<br>(n = 45) | 51-60<br>(n = 46) |           | 61-70<br>(n = 37) | 71-80<br>(n = 18) |
| <b>Baseline characteristics</b>                  |                   |                   |                   |                   |                   |                   |                   |                   |                   |                   |           |                   |                   |
| Weight (kg)                                      | 55 ± 11           | 55 ± 8            | 56 ± 7            | 56 ± 8            | 57 ± 7            | 56 ± 10           | 68 ± 9            | 73 ± 8            | 70 ± 7            | 68 ± 8            | 64 ± 9    | 59 ± 8            | < 0.001           |
| Height (cm)                                      | 162 ± 6           | 159 ± 5           | 158 ± 6           | 157 ± 5           | 156 ± 5           | 153 ± 6           | 173 ± 5           | 174 ± 5           | 172 ± 6           | 170 ± 5           | 165 ± 6   | 163 ± 7           | < 0.001           |
| BSA (m <sup>2</sup> )                            | 1.6 ± 0.1         | 1.6 ± 0.1         | 1.6 ± 0.1         | 1.6 ± 0.1         | 1.6 ± 0.1         | 1.5 ± 0.1         | 1.8 ± 0.1         | 1.9 ± 0.1         | 1.8 ± 0.1         | 1.8 ± 0.1         | 1.7 ± 0.1 | 1.6 ± 0.1         | < 0.001           |
| BMI (kg/m <sup>2</sup> )                         | 21 ± 4            | 22 ± 3            | 22 ± 2            | 23 ± 3            | 23 ± 4            | 24 ± 4            | 23 ± 3            | 24 ± 2            | 24 ± 2            | 24 ± 2            | 23 ± 3    | 22 ± 2            | 0.083             |
| SBP (mm Hg)                                      | 112 ± 10          | 112 ± 12          | 116 ± 13          | 122 ± 14          | 124 ± 11          | 126 ± 8           | 121 ± 11          | 124 ± 11          | 121 ± 10          | 123 ± 11          | 122 ± 14  | 126 ± 11          | 0.403             |
| DBP (mm Hg)                                      | 68 ± 9            | 69 ± 10           | 71 ± 11           | 74 ± 11           | 75 ± 9            | 72 ± 5            | 74 ± 8            | 77 ± 8            | 74 ± 10           | 73 ± 9            | 74 ± 9    | 74 ± 11           | 0.529             |
| HR (bpm)                                         | 71 ± 10           | 70 ± 10           | 70 ± 10           | 68 ± 7            | 66 ± 9            | 68 ± 9            | 70 ± 10           | 70 ± 11           | 68 ± 9            | 65 ± 9            | 65 ± 9    | 72 ± 12           | 0.0014            |
| <b>Conventional echocardiographic parameters</b> |                   |                   |                   |                   |                   |                   |                   |                   |                   |                   |           |                   |                   |
| LVEDD (mm)                                       | 46 ± 3            | 47 ± 3            | 47 ± 4            | 49 ± 3            | 49 ± 3            | 48 ± 3            | 50 ± 3            | 51 ± 3            | 50 ± 3            | 52 ± 3            | 50 ± 4    | 49 ± 3            | 0.021             |
| LVEDS (mm)                                       | 29 ± 2            | 29 ± 2            | 29 ± 3            | 29 ± 2            | 29 ± 3            | 28 ± 3            | 32 ± 3            | 32 ± 3            | 31 ± 3            | 31 ± 3            | 30 ± 3    | 29 ± 2            | 0.007             |
| IVS (mm)                                         | 7 ± 1             | 7 ± 1             | 7 ± 1             | 7 ± 1             | 8 ± 1             | 8 ± 1             | 8 ± 1             | 8 ± 1             | 8 ± 1             | 8 ± 1             | 8 ± 1     | 8 ± 1             | 0.054             |
| LVPW (mm)                                        | 7 ± 1             | 7 ± 1             | 7 ± 1             | 7 ± 1             | 7 ± 1             | 7 ± 1             | 8 ± 1             | 8 ± 1             | 8 ± 1             | 8 ± 1             | 8 ± 1     | 8 ± 1             | 0.003             |
| LVEDV (mL)                                       | 98 ± 19           | 96 ± 15           | 94 ± 17           | 90 ± 15           | 86 ± 16           | 84 ± 13           | 124 ± 16          | 119 ± 22          | 113 ± 18          | 114 ± 19          | 101 ± 20  | 99 ± 14           | < 0.001           |
| LVESV (mL)                                       | 38 ± 12           | 36 ± 7            | 35 ± 8            | 34 ± 8            | 33 ± 8            | 30 ± 7            | 50 ± 8            | 46 ± 10           | 44 ± 9            | 43 ± 10           | 37 ± 9    | 36 ± 5            | < 0.001           |
| LVEDVI (mL/m <sup>2</sup> )                      | 61 ± 11           | 61 ± 8            | 61 ± 9            | 58 ± 9            | 57 ± 10           | 55 ± 10           | 68 ± 8            | 63 ± 11           | 62 ± 10           | 64 ± 11           | 59 ± 10   | 61 ± 9            | 0.005             |
| LVESVI (mL/m <sup>2</sup> )                      | 23 ± 7            | 23 ± 4            | 22 ± 5            | 22 ± 4            | 21 ± 5            | 20 ± 4            | 28 ± 4            | 25 ± 5            | 24 ± 5            | 24 ± 6            | 22 ± 5    | 22 ± 3            | < 0.001           |
| LVEF (%)                                         | 62 ± 5            | 62 ± 4            | 63 ± 4            | 62 ± 4            | 63 ± 4            | 64 ± 4            | 60 ± 3            | 61 ± 4            | 62 ± 4            | 62 ± 5            | 63 ± 5    | 63 ± 4            | 0.007             |
| LVM (gm)                                         | 97 ± 18           | 103 ± 20          | 107 ± 22          | 116 ± 23          | 124 ± 23          | 124 ± 24          | 135 ± 24          | 138 ± 27          | 133 ± 24          | 146 ± 23          | 143 ± 28  | 141 ± 23          | 0.176             |
| LVM1 (gm/m <sup>2</sup> )                        | 61 ± 8            | 66 ± 11           | 69 ± 13           | 74 ± 13           | 80 ± 14           | 81 ± 12           | 74 ± 11           | 73 ± 13           | 73 ± 12           | 82 ± 13           | 84 ± 14   | 87 ± 15           | < 0.001           |

p values were obtained from the analysis of variance test. SD: standard deviation, BSA: body surface area, BMI: body mass index, SBP: systolic blood pressure, DBP: diastolic blood pressure, HR: heart rate, LVEDD: left ventricular end-diastolic dimension, LVEDS: left ventricular end-systolic dimension, IVS: interventricular septum, LVPW: left ventricular posterior wall, LVEDV: left ventricular end-diastolic volume, LVESV: left ventricular end-systolic volume, LVEDVI: left ventricular end-diastolic volume index, LVESVI: left ventricular end-systolic volume index, LVEF: left ventricular ejection fraction, LVM: left ventricular mass, LVM1: left ventricular mass index
