# Supplementary material for: Normal 2-Dimensional Strain Values of the Left Ventricle: A Substudy of the Normal Echocardiographic Measurements in Korean Population Study
Source: PubMed Central journal article supplement — J Cardiovasc Ultrasound. 2016 Dec 28;24(4):285–93. doi: 10.4250/jcu.2016.24.4.285 (PMC5234340; doi:10.4250/jcu.2016.24.4.285), 2016-12-28
Supplement: jcu-24-285-s002.pdf [file jcu-24-285-s002.pdf]

**Supplementary Table 2.** Left ventricular 2-dimensional longitudinal strain and strain rates according to sex and age (mean ± SD)

| Age group                                             | Females (n = 265) |                   |                   |                   |                   | Males (n = 236)   |         |                   |                   |                   | p value      |                   |                   |                   |
|-------------------------------------------------------|-------------------|-------------------|-------------------|-------------------|-------------------|-------------------|---------|-------------------|-------------------|-------------------|--------------|-------------------|-------------------|-------------------|
|                                                       | 21-30<br>(n = 46) | 31-40<br>(n = 51) | 41-50<br>(n = 58) | 51-60<br>(n = 53) | 61-70<br>(n = 39) | 71-80<br>(n = 18) | p value | 21-30<br>(n = 39) | 31-40<br>(n = 51) | 41-50<br>(n = 45) |              | 51-60<br>(n = 46) | 61-70<br>(n = 37) | 71-80<br>(n = 18) |
| <b>LVLS (%)</b>                                       |                   |                   |                   |                   |                   |                   |         |                   |                   |                   |              |                   |                   |                   |
| A4C view                                              | -21.1 ± 2.2       | -21.6 ± 2.5       | -20.6 ± 2.1       | -20.8 ± 1.9       | -20.4 ± 2.1       | -20.7 ± 2.4       | 0.111   | -18.7 ± 1.7       | -18.6 ± 2.2       | -19.5 ± 2.1       | -19.1 ± 1.8  | -19.9 ± 2.2       | -19.6 ± 2.6       | 0.021             |
| A3C view                                              | -21.0 ± 3.3       | -21.6 ± 3.0       | -20.5 ± 2.8       | -20.0 ± 1.9       | -20.0 ± 2.8       | -21.0 ± 2.7       | 0.057   | -19.2 ± 2.0       | -18.7 ± 2.5       | -19.2 ± 1.8       | -18.8 ± 2.0  | -19.5 ± 2.8       | -19.8 ± 2.8       | 0.407             |
| A2C view                                              | -22.7 ± 2.7       | -22.6 ± 2.9       | -21.8 ± 2.2       | -21.5 ± 2.5       | -21.6 ± 2.3       | -21.4 ± 2.6       | 0.024   | -20.1 ± 2.0       | -19.7 ± 2.3       | -20.4 ± 2.6       | -20.3 ± 2.0  | -20.7 ± 2.8       | -20.9 ± 2.7       | 0.311             |
| IVGLS                                                 | -21.6 ± 2.4       | -22.0 ± 2.4       | -20.9 ± 2.0       | -21.0 ± 2.6       | -20.6 ± 2.0       | -21.0 ± 2.2       | 0.0015  | -19.3 ± 1.5       | -19.1 ± 2.3       | -19.7 ± 1.8       | -19.4 ± 1.6  | -20.1 ± 2.3       | -20.1 ± 2.4       | 0.108             |
| <b>LV longitudinal systolic (S) strain rate (1/s)</b> |                   |                   |                   |                   |                   |                   |         |                   |                   |                   |              |                   |                   |                   |
| A4C view                                              | -1.25 ± 0.15      | -1.28 ± 0.22      | -1.20 ± 0.17      | -1.19 ± 0.19      | -1.15 ± 0.19      | -1.21 ± 0.19      | 0.022   | -1.15 ± 0.22      | -1.12 ± 0.16      | -1.14 ± 0.17      | -1.11 ± 0.16 | -1.13 ± 0.14      | -1.13 ± 0.12      | 0.835             |
| A3C view                                              | -1.30 ± 0.24      | -1.31 ± 0.24      | -1.24 ± 0.21      | -1.20 ± 0.17      | -1.20 ± 0.18      | -1.24 ± 0.26      | 0.061   | -1.18 ± 0.19      | -1.15 ± 0.15      | -1.14 ± 0.24      | -1.12 ± 0.15 | -1.20 ± 0.21      | -1.21 ± 0.16      | 0.327             |
| A2C view                                              | -1.31 ± 0.25      | -1.31 ± 0.24      | -1.26 ± 0.17      | -1.27 ± 0.21      | -1.24 ± 0.19      | -1.31 ± 0.23      | 0.299   | -1.21 ± 0.20      | -1.17 ± 0.18      | -1.22 ± 0.23      | -1.19 ± 0.19 | -1.24 ± 0.16      | -1.28 ± 0.20      | 0.376             |
| IVGLSR                                                | -1.29 ± 0.17      | -1.30 ± 0.21      | -1.23 ± 0.16      | -1.23 ± 0.16      | -1.21 ± 0.16      | -1.26 ± 0.19      | 0.095   | -1.17 ± 0.17      | -1.15 ± 0.14      | -1.17 ± 0.18      | -1.14 ± 0.14 | -1.19 ± 0.13      | -1.20 ± 0.12      | 0.501             |

p values were obtained from the analysis of variance test. SD: standard deviation, LVLS: left ventricular longitudinal strain, A4C: apical 4-chamber, A3C: apical 3-chamber, A2C: apical 2-chamber, IVGLS: left ventricular global longitudinal systolic strain, LV: left ventricle, IVGLSR: left ventricular global longitudinal systolic strain rate
